# Supplementary material for: Development of an automated colorimeter controlled by Raspberry Pi4
Source: Royal Society of Chemistry journal article supplement (doi:10.1039/d2ay01532c), 2023-01-01
Supplement: d2ay01532c1.pdf [file d2ay01532c1.pdf]

## Electronic supplementary information

### **Development of an automated colorimeter controlled by Raspberry Pi4**

Kevin U. Antela,<sup>a</sup> Roberto Sáez-Hernández,<sup>a</sup> M. Luisa Cervera,<sup>a</sup> Ángel Morales-Rubio\*<sup>a</sup> and M. José Luque<sup>b</sup>

---

<sup>a</sup> Department of Analytical Chemistry, Research Building, University of Valencia, 46100 Burjassot, Valencia (Spain).

<sup>b</sup> Optics Department, Physics Faculty, University of Valencia, 46100 Burjassot, Valencia (Spain).

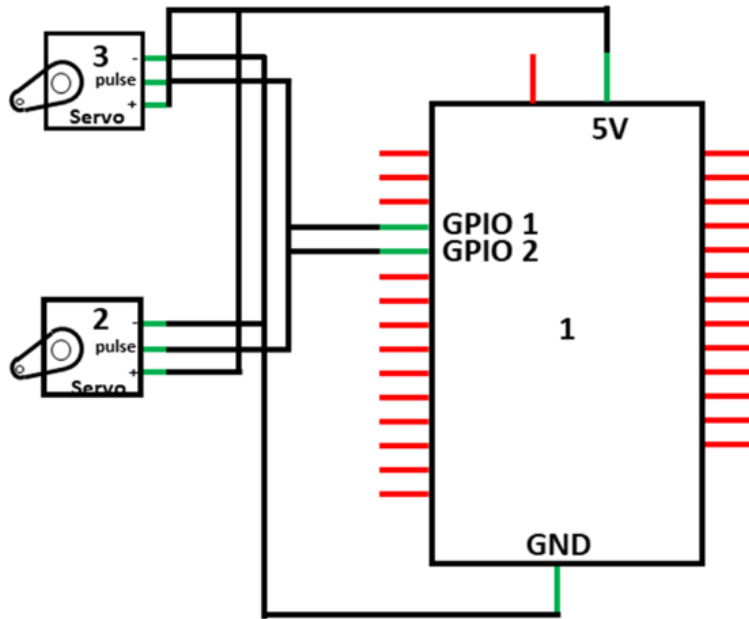

| Reference | Value         | Description     |
|-----------|---------------|-----------------|
| 1         | Raspberry Pi4 | Microcontroller |
| 2         | MG995 RC      | Servo motor     |
| 3         | Sg90          | Servo motor     |

Figure S1: Connection between the sampler module components

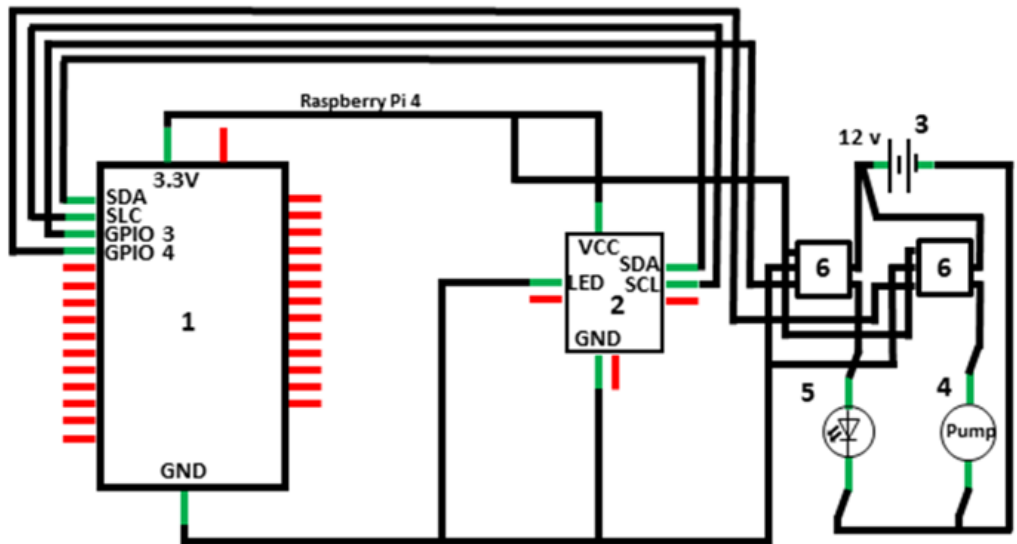

| Reference | Value              | Description      |
|-----------|--------------------|------------------|
| 1         | Raspberry Pi4      | Microcontroller  |
| 2         | TCS34725 RGBC      | Color sensor     |
| 3         | 12V                | Battery          |
| 4         | YD-GSGJZJCHAO20100 | Peristaltic Pump |
| 5         | B07DPRWVRF         | LED              |
| 6         | Ky-019             | Relay            |

Figure S2: Connection between the different components in the measurement module
